# Supplementary material for: Parental Food Choices and Engagement in Raising Children’s Awareness of Sustainable Behaviors in Urban Poland
Source: MDPI journal article supplement (doi:10.3390/ijerph18063225), 2021-03-20
Supplement: s1 [file s1]

Supplementary files:

Table S1. Survey questions analysed in the paper

| Question                                                                                                                                                                                                                                                                                                                            | Answers/options                                                                                                                                                                                                                                                                                                                                                                                                                                                                                                                                                                                          |
|-------------------------------------------------------------------------------------------------------------------------------------------------------------------------------------------------------------------------------------------------------------------------------------------------------------------------------------|----------------------------------------------------------------------------------------------------------------------------------------------------------------------------------------------------------------------------------------------------------------------------------------------------------------------------------------------------------------------------------------------------------------------------------------------------------------------------------------------------------------------------------------------------------------------------------------------------------|
| <p>Q1. Please name the most important factors determining your choice when buying food for your child<br/><i>Open-ended question, max. three factors</i></p>                                                                                                                                                                        | <p>1.<br/>2.<br/>3.</p>                                                                                                                                                                                                                                                                                                                                                                                                                                                                                                                                                                                  |
| <p>Q2. Please indicate to what extent each of the factors (randomly rotated) is important to you when choosing food for your child<br/><i>Single-response matrix question with a five-level Likert-type scale: very important // rather important // neither important nor unimportant // rather unimportant // unimportant</i></p> | <p>Price<br/>Child's health<br/>Protection of the natural environment<br/>Taste<br/>Organic production<br/>Opinions of the child's peers<br/>Convenience (food easy to prepare)<br/>Reusable packaging<br/>Certified high quality of product<br/>Local origin to support Polish producers<br/>Local origin of to reduce food transport<br/>Principles of healthy eating<br/>Symbols certifying the product's special-quality attributes<br/>Advertising<br/>Consumer trends<br/>Recommendations of health professionals<br/>Recommendations of research institutes or experts<br/>Teachers' opinions</p> |
| <p>Q3. Do you discuss the following topics in the presence of your child?<br/><i>Dichotomous question<br/>Yes/No<br/>Topics randomly rotated</i></p>                                                                                                                                                                                | <p>Buying / eating seasonal food<br/>Reducing food waste<br/>Reducing consumption of animal products i.e. meat or eggs<br/>Buying local products to reduce food transport<br/>Increasing consumption of natural, minimally-processed food<br/>Limiting plastic bottle water purchases<br/>Reducing consumption of highly processed products<br/>Waste segregation<br/>Sorting food packaging<br/>Need to protect the natural environment<br/>Prevalence of hunger in Poland and worldwide<br/>Maintaining health with proper nutrition</p>                                                               |

Q4. Why do you not include your child in conversations on the following topics?

*Single choice matrix question*

*Topics – as in Q3*

I don't know enough about it  
I'm not interested in it  
I don't have time  
I think it is not an important problem  
The child is still too young  
The school should take care of it  
Other reason

Q5. Are you familiar with the term “sustainable food consumption”?

*Dichotomous question*

Yes  
No

Q6. What do you think is meant by “sustainable food consumption”?

*Single choice question*

The energy value of consumed food equals the body's energy expenditure  
The share of plant and animal products in the food consumed is the same  
Everyday diet is carried out so as to minimize the influence on the natural environment  
The cost of nutrition is adapted to the financial capabilities of the household  
Other (please enter)

Q7. Do you teach your child to pay attention to the natural environment in the context of producing and consuming food?

*Single choice question*

Yes, I have been doing this for years  
Yes, only recently  
No, but I'm going to do it soon  
No and I'm not going to do it because...

Q8. Who is responsible for teaching children about the following topics?

*Multi-response question:*

*Parents / Grandparents and other adult family members / School / Media (TV, internet, press) / Others*

A. Environmental protection  
B. The link between diet and health  
C. Avoiding food waste
